# Supplementary material
Source: publisher figshare collection journal article supplement (https://tandf.figshare.com/articles/dataset/_/6182027)
Supplement: Supplementary file 1 [file 1]

% Reduced ion mobility (cm<sup>2</sup>/V/s) at vanishing electric field strengths  
 at 273.16 K and 1 atm.

% Measured data / (n,6,4) potential / (n,6,4) potential with  
 K2=1.44 / Ion / Ref.

% Neutral gas = He

|         |         |         |                                    |     |
|---------|---------|---------|------------------------------------|-----|
| 19.9000 | 33.3188 | 23.2828 | % N+                               | [5] |
| 20.7000 | 29.3068 | 21.4634 | % Ar+                              | [4] |
| 22.5000 | 33.9384 | 22.6950 | % O+                               | [4] |
| 20.9000 | 26.6914 | 21.5109 | % N <sub>2</sub> +                 | [5] |
| 19.8000 | 27.7866 | 21.3709 | % CO+                              | [4] |
| 21.3000 | 28.9920 | 21.6362 | % NO+                              | [4] |
| 21.8000 | 29.4064 | 21.6658 | % O <sub>2</sub> +                 | [4] |
| 20.2000 | 27.3674 | 21.2017 | % HCO+                             | [4] |
| 19.4000 | 27.7113 | 21.2270 | % HO <sub>2</sub> +                | [4] |
| 23.0000 | 29.8986 | 22.5016 | % NH <sub>3</sub> +                | [4] |
| 21.9000 | 28.6280 | 22.0652 | % NH <sub>4</sub> +                | [4] |
| 18.5000 | 26.5583 | 20.7946 | % H <sub>2</sub> O <sub>2</sub> +  | [4] |
| 17.0000 | 22.4382 | 18.6342 | % CH <sub>3</sub> O <sub>2</sub> + | [1] |
| 21.5000 | 27.5753 | 21.1231 | % O <sub>2</sub> -                 | [1] |
| 24.3000 | 29.4536 | 22.3035 | % OH-                              | [5] |
| 18.6000 | 23.7940 | 19.3390 | % O <sub>3</sub> -                 | [1] |
| 18.6000 | 24.2889 | 19.6098 | % NO <sub>2</sub> -                | [3] |
| 21.5000 | 29.9098 | 21.2928 | % H <sub>3</sub> O+                | [6] |
| 18.6000 | 24.5916 | 19.8169 | % N <sub>2</sub> O+                | [3] |

% Neutral gas = Ar

|        |        |        |                     |     |
|--------|--------|--------|---------------------|-----|
| 3.4300 | 4.6702 | 3.2124 | % O+                | [1] |
| 2.5700 | 3.6640 | 2.4753 | % O <sub>2</sub> +  | [1] |
| 2.4200 | 3.0692 | 1.9649 | % O <sub>3</sub> -  | [1] |
| 2.4900 | 3.7298 | 2.5058 | % HCO+              | [1] |
| 2.6500 | 4.3999 | 2.9795 | % H <sub>2</sub> O+ | [1] |
| 2.1500 | 3.3119 | 2.2229 | % N <sub>2</sub> O+ | [1] |
| 2.2400 | 3.2879 | 2.2062 | % NO <sub>2</sub> + | [1] |
| 3.1500 | 3.3547 | 2.2733 | % H <sub>3</sub> O+ | [1] |

% Neutral gas = N<sub>2</sub>

|        |        |        |                     |     |
|--------|--------|--------|---------------------|-----|
| 2.1800 | 2.9733 | 2.0682 | % CO <sub>2</sub> + | [2] |
| 2.1400 | 3.3087 | 2.3006 | % N <sub>2</sub> H+ | [2] |

2.7600      3.7698      2.6267 % H30+      [2]

%%%%%%%%%

% Neutral gas = Ne

%%%%%%%%%

7.8000      14.7961      9.8962 % H20+      [3]

8.2500      12.8458      8.7078 % O2+      [3]

7.0000      10.9442      8.1282 % N20+      [3]

## REFERENCES

[1] I.Dotan, W.Lindinger and D.L.Albritton, 'Mobilities of various mass-identified positive and negative ions in helium and argon', J. Chem. Phys. 64, 4544 (1976).

[2] I.Dotan and D.L.Albritton, 'Mobilities of CO2+, N2H+, H30+, H30+.H20 and H30+.(H20)2 ions in N2', J. Chem. Phys. 65, 5028 (1976).

[3] H.Bohringer, M.DurupFerguson, and D.W.Fahey, 'Mobilities of various massidentified positive ions in helium, neon and argon', J. Chem. Phys. 79, 1974 (1983).

[4] W.Lindinger and D.L.Albritton, 'Mobilities of various mass-identified positive ions in helium and argon', J.Chem.Phys. 62, 3517 (1975).

[5] M.McFarland, D.L.Albritton, F.C.Fehsenfeld, E.E.Ferguson and A.L.Schmeltekopf, 'Flow-drift technique for ion mobility and ion-molecule reaction rate constant measurements. I.Apparatus and mobility measurements', J. Chem. Phys. 59, 6610 (1973).

[6] E.Graham IV, D.R.James, W.C.Keever, D.L.Albritton and E.W.McDaniel, 'Mobilities and longitudinal diffusion coefficients of mass-identified hydrogen ions in H2 and deuterium ions in D2 gas', J. Chem. Phys. 59, 3477 (1973).
