# Supplementary material
Source: publisher figshare collection journal article supplement (https://tandf.figshare.com/articles/dataset/_/6182027)
Supplement: Supplementary file 2 [file 1]

% Most data on the polarizability and Ionization energy are collected from CCCBDB (D. J. I. Russell, Nist computational chemistry comparison and bench- mark database, 2013).

%

% Data of enthalpy of formation are from Burcat's work (A. Burcat, Ideal gas thermodynamic data in polynomial form for combustion and air pollution use, 2006).

%

% Ip or dH(A+) = 0 means that the data is not available in the literature.

%

% Polarizability (A3) / Element number (CHON) / Ionization energy (eV) / Enthalpy of formation of an ion and its parent neutral (kJ/mole) / Species / Data source

%

| % polar                               | C | H | O | N | Ip    | dH(A+)   | dH(A)    | species  | %     |
|---------------------------------------|---|---|---|---|-------|----------|----------|----------|-------|
| 0.281                                 | 0 | 1 | 0 | 0 | 13.60 | 1536.244 | 217.998  | % H      | %     |
| BLYP,cc-pVTZ                          |   |   |   |   |       |          |          |          |       |
| 0.455                                 | 0 | 2 | 0 | 0 | 15.43 | 1494.677 | 0.       | % H2     | %     |
| BLYP,cc-pVDZ                          |   |   |   |   |       |          |          |          |       |
| 0.678                                 | 0 | 0 | 1 | 0 | 13.62 | 1568.787 | 249.175  | % O      | %     |
| B3LYP,aug-ccpVDZ, oxygen atom         |   |   |   |   |       |          |          |          |       |
| 0.743                                 | 0 | 1 | 1 | 0 | 13.02 | 1299.213 | 37.3     | % OH     | % BcT |
| 0.743                                 | 0 | 1 | 1 | 0 | 0.00  | 0.       | 0.       | % OH*    | %     |
| same value as OH                      |   |   |   |   |       |          |          |          |       |
| 1.053                                 | 0 | 2 | 1 | 0 | 12.62 | 981.806  | -241.826 | % H2O    | %     |
| 1.131                                 | 0 | 0 | 2 | 0 | 12.07 | 1171.828 | 0.       | % O2     | % BcT |
| 1.489                                 | 0 | 1 | 2 | 0 | 11.35 | 1113.774 | 12.296   | % H02    | % BcT |
| 1.773                                 | 0 | 2 | 2 | 0 | 10.58 | 895.122  | -135.88  | % H2O2   | % BcT |
| 1.081                                 | 0 | 0 | 0 | 1 | 14.53 | 1872.924 | 470.818  | % N      | %     |
| B3LYP aug-cc-pVDZ, nitrogen atom      |   |   |   |   |       |          |          |          |       |
| 1.760                                 | 0 | 0 | 0 | 2 | 15.58 | 1509.509 | 0.       | % N2     | %     |
| 1.435 BcT; 1.760 Arm1.3; 1.740 Prager |   |   |   |   |       |          |          |          |       |
| 1.285                                 | 0 | 0 | 1 | 1 | 9.26  | 990.807  | 91.137   | % NO     | %     |
| BcT, nitric oxide                     |   |   |   |   |       |          |          |          |       |
| 2.378                                 | 0 | 0 | 1 | 2 | 12.89 | 1329.146 | 81.6     | % N2O    | %     |
| BcT, nitrous oxide                    |   |   |   |   |       |          |          |          |       |
| 2.210                                 | 0 | 0 | 2 | 1 | 9.59  | 964.409  | 34.193   | % N02    | %     |
| BcT, nitrogen dioxide                 |   |   |   |   |       |          |          |          |       |
| 1.286                                 | 1 | 0 | 0 | 0 | 11.26 | 1809.444 | 716.67   | % C      | %     |
| B3LYP,cc-pV(T+d)Z                     |   |   |   |   |       |          |          |          |       |
| 1.745                                 | 1 | 1 | 0 | 0 | 10.64 | 1630.571 | 592.5    | % CH     | %     |
| ground,2\pi_{1/2} C*V;                |   |   |   |   |       |          |          |          |       |
| 1.654                                 | 1 | 2 | 0 | 0 | 10.40 | 1399.825 | 391.2    | % CH2    | %     |
| ground,^3B_1 C2V                      |   |   |   |   |       |          |          |          |       |
| 2.009                                 | 1 | 2 | 0 | 0 | 0.00  | 1399.825 | 428.8    | % CH2(S) | %     |
| ^1A_1 C2V                             |   |   |   |   |       |          |          |          |       |
| 1.897                                 | 1 | 3 | 0 | 0 | 9.84  | 1101.792 | 146.7    | % CH3    | %     |
| methyl radical                        |   |   |   |   |       |          |          |          |       |
| 2.600                                 | 1 | 4 | 0 | 0 | 12.61 | 1150.0   | -74.6    | % CH4    | %     |

|                                      |   |   |   |   |       |          |          |            |   |
|--------------------------------------|---|---|---|---|-------|----------|----------|------------|---|
| 2.262 BcT; 2.60 Arm1.3; 2.448 Prager |   |   |   |   |       |          |          |            |   |
| 1.390                                | 1 | 1 | 0 | 0 | 10.64 | 1630.571 | 667.919  | % CH*      | % |
| 4\Sigma- C*V; system error, -1.474   |   |   |   |   |       |          |          |            |   |
| 1.950                                | 1 | 0 | 1 | 0 | 14.01 | 1238.337 | -110.53  | % C0       | % |
| 1.685 BcT; Arm1.3                    |   |   |   |   |       |          |          |            |   |
| 2.138                                | 1 | 1 | 1 | 0 | 8.12  | 833.940  | 42.3     | % HCO      | % |
| Formyl radical                       |   |   |   |   |       |          |          |            |   |
| 2.292                                | 1 | 2 | 1 | 0 | 10.89 | 948.386  | -109.164 | % CH2O     | % |
| Formaldehyde                         |   |   |   |   |       |          |          |            |   |
| 2.524                                | 1 | 2 | 1 | 0 | 0.00  | 0.       | 0.       | % HCOH     | % |
| Hydroxycarbene                       |   |   |   |   |       |          |          |            |   |
| 2.551                                | 1 | 3 | 1 | 0 | 7.56  | 716.400  | -17.0    | % CH2OH    | % |
| hydroxymethyl radical                |   |   |   |   |       |          |          |            |   |
| 2.669                                | 1 | 3 | 1 | 0 | 10.72 | 1061.172 | 21.0     | % CH3O     | % |
| methoxy radical                      |   |   |   |   |       |          |          |            |   |
| 2.786                                | 1 | 4 | 1 | 0 | 10.84 | 852.493  | -200.94  | % CH3OH    | % |
| 2.650                                | 1 | 0 | 2 | 0 | 13.78 | 943.137  | -393.51  | % C02      | % |
| 2.139 BcT; Arm1.3                    |   |   |   |   |       |          |          |            |   |
| 2.787                                | 1 | 1 | 2 | 0 | 8.20  | 604.166  | -181.32  | % OCHO     | % |
| Hydrocarboxyl                        |   |   |   |   |       |          |          |            |   |
| 2.859                                | 1 | 2 | 2 | 0 | 11.33 | 0.       | 0.       | % HOCHO    | % |
| formic acid                          |   |   |   |   |       |          |          |            |   |
| 2.800                                | 1 | 2 | 2 | 0 | 0.00  | 0.       | 0.       | % CH2O2    | % |
| dioxirane                            |   |   |   |   |       |          |          |            |   |
| 3.324                                | 1 | 2 | 3 | 0 | 0.00  | 0.       | 0.       | % HO2CHO   | % |
| Carbonic acid, H2CO3                 |   |   |   |   |       |          |          |            |   |
| 3.511                                | 1 | 3 | 2 | 0 | 0.00  | 0.       | 0.       | % HOCH2O   | % |
| CH2OOH                               |   |   |   |   |       |          |          |            |   |
| 3.334                                | 1 | 3 | 2 | 0 | 0.00  | 0.       | 0.       | % CH3O2    | % |
| methylperoxy radical                 |   |   |   |   |       |          |          |            |   |
| 3.647                                | 1 | 4 | 2 | 0 | 0.00  | 0.       | 0.       | % CH3O2H   | % |
| methyl peroxide                      |   |   |   |   |       |          |          |            |   |
| 3.357                                | 1 | 4 | 2 | 0 | 0.00  | 0.       | 0.       | % CH2(OH)2 | % |
| methanediol                          |   |   |   |   |       |          |          |            |   |
| 4.159                                | 1 | 4 | 3 | 0 | 0.00  | 0.       | 0.       | % HOCH2O2H | % |
| B3LYP,TZVP; hydroxy methyl peroxide  |   |   |   |   |       |          |          |            |   |
| 2.999                                | 2 | 0 | 0 | 0 | 11.40 | 1980.05  | 826.799  | % C2       | % |
| Semi-empirical,PM6, carbon diatomic  |   |   |   |   |       |          |          |            |   |
| 4.120                                | 2 | 0 | 0 | 0 | 0.00  | 1980.05  | 842.402  | % C2*      | % |
| BcT, ground 2                        |   |   |   |   |       |          |          |            |   |
| 2.974                                | 2 | 1 | 0 | 0 | 11.61 | 1697.10  | 568.056  | % C2H      | % |
| ethynyl radical                      |   |   |   |   |       |          |          |            |   |
| 2.867                                | 2 | 2 | 0 | 0 | 11.40 | 1333.918 | 228.20   | % C2H2     | % |
| acetylene                            |   |   |   |   |       |          |          |            |   |
| 3.135                                | 2 | 2 | 0 | 0 | 0.00  | 0.       | 0.       | % CCH2     | % |
| vinylidene, ground                   |   |   |   |   |       |          |          |            |   |
| 3.395                                | 2 | 3 | 0 | 0 | 8.25  | 1122.34  | 296.580  | % C2H3     | % |
| vinyl                                |   |   |   |   |       |          |          |            |   |
| 3.584                                | 2 | 4 | 0 | 0 | 10.51 | 1074.461 | 52.500   | % C2H4     | % |
| ethylene                             |   |   |   |   |       |          |          |            |   |

[illegible]

|                                   |   |   |   |   |       |          |         |              |       |
|-----------------------------------|---|---|---|---|-------|----------|---------|--------------|-------|
| 4.618                             | 2 | 2 | 3 | 0 | 0.00  | 0.       | 0.      | % CHOCOOH    | % oxo |
| acetic acid                       |   |   |   |   |       |          |         |              |       |
| 5.174                             | 2 | 3 | 3 | 0 | 0.00  | 0.       | 0.      | % CH3C03     | %     |
| CH3C(0)00, acetyl peroxy radical  |   |   |   |   |       |          |         |              |       |
| 5.109                             | 2 | 4 | 3 | 0 | 0.00  | 0.       | 0.      | % H0CH2C00H  | %     |
| BcT, hydroxyacetic acid           |   |   |   |   |       |          |         |              |       |
| 4.441                             | 3 | 0 | 0 | 0 | 13.00 | 1988.93  | 822.025 | % C3         | %     |
| BcT, carbon trimer                |   |   |   |   |       |          |         |              |       |
| 5.845                             | 3 | 0 | 2 | 0 | 10.61 | 935.95   | -95.59  | % C302       | %     |
| carbon suboxide                   |   |   |   |   |       |          |         |              |       |
| 4.943                             | 3 | 3 | 0 | 0 | 8.67  | 1201.645 | 348.427 | % C3H3       | %     |
| propargyl radical                 |   |   |   |   |       |          |         |              |       |
| 4.829                             | 3 | 4 | 0 | 0 | 10.36 | 0.       | 0.      | % C3H4-P     | %     |
| CH3CCH, propyne                   |   |   |   |   |       |          |         |              |       |
| 5.368                             | 3 | 4 | 0 | 0 | 9.69  | 0.       | 0.      | % C3H4-A     | %     |
| CH2CCH2, allene                   |   |   |   |   |       |          |         |              |       |
| 4.729                             | 3 | 4 | 0 | 0 | 8.16  | 0.       | 0.      | % CC3H4      | %     |
| cyclopropene                      |   |   |   |   |       |          |         |              |       |
| 5.499                             | 3 | 5 | 0 | 0 | 8.18  | 0.       | 0.      | % C3H5-A     | %     |
| C3H5, allyl                       |   |   |   |   |       |          |         |              |       |
| 5.323                             | 3 | 5 | 0 | 0 | 0.00  | 0.       | 0.      | % C3H5-S     | %     |
| CH3CHCH, 1-propenyl               |   |   |   |   |       |          |         |              |       |
| 5.499                             | 3 | 5 | 0 | 0 | 0.00  | 0.       | 0.      | % C3H5-T     | % the |
| same as C3H5-A                    |   |   |   |   |       |          |         |              |       |
| 5.494                             | 3 | 6 | 0 | 0 | 9.73  | 0.       | 0.      | % C3H6       | %     |
| CH2CHCH3, propene                 |   |   |   |   |       |          |         |              |       |
| 5.642                             | 3 | 7 | 0 | 0 | 7.37  | 0.       | 0.      | % IC3H7      | %     |
| Isopropyl raidcal                 |   |   |   |   |       |          |         |              |       |
| 5.619                             | 3 | 7 | 0 | 0 | 8.09  | 0.       | 0.      | % NC3H7      | % n-  |
| propyl raidcal                    |   |   |   |   |       |          |         |              |       |
| 5.819                             | 3 | 8 | 0 | 0 | 10.94 | 0.       | 0.      | % C3H8       | %     |
| Propane                           |   |   |   |   |       |          |         |              |       |
| 5.769                             | 3 | 4 | 1 | 0 | 0.00  | 0.       | 0.      | % C2H3CHO    | %     |
| BcT, CH2CHCHO, acrolein           |   |   |   |   |       |          |         |              |       |
| 5.496                             | 3 | 4 | 1 | 0 | 8.95  | 0.       | 0.      | % CH3CHCO    | %     |
| B3LYP,TZVP; methylketene          |   |   |   |   |       |          |         |              |       |
| 6.272                             | 3 | 4 | 1 | 0 | 10.51 | 0.       | 0.      | % C3H40      | % 2-  |
| propyn-1-ol, B3LYP, aug-cc-pVTZ   |   |   |   |   |       |          |         |              |       |
| 5.842                             | 3 | 6 | 1 | 0 | 9.70  | 0.       | 0.      | % CH3C0CH3   | %     |
| BcT, acetone                      |   |   |   |   |       |          |         |              |       |
| 5.832                             | 3 | 6 | 1 | 0 | 9.96  | 0.       | 0.      | % CH3CH2CHO  | %     |
| propanal                          |   |   |   |   |       |          |         |              |       |
| 5.921                             | 3 | 6 | 1 | 0 | 9.67  | 0.       | 0.      | % C3H601-2   | %     |
| B2PLYP, cc-pVTZ, 2-propylene-1-ol |   |   |   |   |       |          |         |              |       |
| 5.599                             | 3 | 6 | 1 | 0 | 0.00  | 0.       | 0.      | % C3H601-3   | %     |
| BcT, 1,3-propylene oxide, oxetane |   |   |   |   |       |          |         |              |       |
| 5.702                             | 3 | 6 | 1 | 0 | 10.22 | 0.       | 0.      | % C3H60      | %     |
| propylene oxide                   |   |   |   |   |       |          |         |              |       |
| 6.393                             | 3 | 8 | 1 | 0 | 10.17 | 0.       | 0.      | % CH3CH0HCH3 | %     |
| isopropyl alcohol                 |   |   |   |   |       |          |         |              |       |

|                                      |   |   |   |   |       |         |         |              |       |
|--------------------------------------|---|---|---|---|-------|---------|---------|--------------|-------|
| 6.353                                | 3 | 8 | 1 | 0 | 10.22 | 0.      | 0.      | % C3H7OH     | % 1-  |
| propanol                             |   |   |   |   |       |         |         |              |       |
| 6.507                                | 3 | 8 | 1 | 0 | 9.72  | 0.      | 0.      | % CH3OC2H5   | %     |
| ethane, methoxy-                     |   |   |   |   |       |         |         |              |       |
| 6.304                                | 3 | 6 | 2 | 0 | 0.00  | 0.      | 0.      | % AC3H500H   | %     |
| Propanoic acid                       |   |   |   |   |       |         |         |              |       |
| 6.915                                | 3 | 8 | 2 | 0 | 0.00  | 0.      | 0.      | % NC3H7O2H   | %     |
| Propylene glycol, HOCH2CH(OH)CH3     |   |   |   |   |       |         |         |              |       |
| 6.854                                | 3 | 8 | 2 | 0 | 0.00  | 0.      | 0.      | % IC3H7O2H   | %     |
| 1,3-Propanediol, HO(CH2)3OH          |   |   |   |   |       |         |         |              |       |
| 5.638                                | 3 | 2 | 2 | 0 | 0.00  | 0.      | 0.      | % C3H2O2     | %     |
| propionic acid                       |   |   |   |   |       |         |         |              |       |
| 5.647                                | 3 | 4 | 2 | 0 | 9.70  | 0.      | 0.      | % C3H4O2     | %     |
| beta-propiolactone                   |   |   |   |   |       |         |         |              |       |
| 6.950                                | 3 | 4 | 2 | 0 | 0.00  | 0.      | 0.      | % HOCHCCHOH  | %     |
| allenediol                           |   |   |   |   |       |         |         |              |       |
| 6.347                                | 3 | 6 | 2 | 0 | 10.25 | 0.      | 0.      | % CH3C00CH3  | %     |
| methyl acetate                       |   |   |   |   |       |         |         |              |       |
| 6.549                                | 3 | 6 | 2 | 0 | 10.61 | 0.      | 0.      | % HC00C2H5   | %     |
| ethyl formate                        |   |   |   |   |       |         |         |              |       |
| 6.126                                | 3 | 6 | 2 | 0 | 9.90  | 0.      | 0.      | % C3H6O2     | %     |
| 1,3-dioxolane, B3LYP,TZVP            |   |   |   |   |       |         |         |              |       |
| 6.171                                | 3 | 4 | 3 | 0 | 10.40 | 0.      | 0.      | % C2H4C03    | %     |
| ethylene carbonate                   |   |   |   |   |       |         |         |              |       |
| 6.648                                | 3 | 6 | 3 | 0 | 10.30 | 0.      | 0.      | % C3H6O3     | %     |
| 1,3,5-trioxane                       |   |   |   |   |       |         |         |              |       |
| 7.044                                | 4 | 0 | 0 | 0 | 12.54 | 0.      | 0.      | % C4         | %     |
| carbon tetramer                      |   |   |   |   |       |         |         |              |       |
| 6.517                                | 4 | 2 | 0 | 0 | 10.17 | 1447.72 | 458.299 | % C4H2       | %     |
| BcT, diacetylene                     |   |   |   |   |       |         |         |              |       |
| 8.008                                | 4 | 4 | 0 | 0 | 9.15  | 0.      | 0.      | % C4H4       | %     |
| BcT, H2CCCCCH2                       |   |   |   |   |       |         |         |              |       |
| 6.790                                | 4 | 4 | 0 | 0 | 9.58  | 0.      | 0.      | % C2H3CCH    | %     |
| BcT, 1-Buten-3-yne                   |   |   |   |   |       |         |         |              |       |
| 7.420                                | 4 | 6 | 0 | 0 | 9.03  | 0.      | 0.      | % C4H612     | %     |
| BcT, 1,2-Butadiene                   |   |   |   |   |       |         |         |              |       |
| 6.907                                | 4 | 6 | 0 | 0 | 9.58  | 0.      | 0.      | % C4H6-2     | % 2-  |
| Butyne                               |   |   |   |   |       |         |         |              |       |
| 6.686                                | 4 | 6 | 0 | 0 | 10.18 | 0.      | 0.      | % CHCCH2CH3  | % 1-  |
| Butyne                               |   |   |   |   |       |         |         |              |       |
| 7.624                                | 4 | 6 | 0 | 0 | 9.07  | 0.      | 0.      | % CH2CHCHCH2 | %     |
| 1,3-Butadiene                        |   |   |   |   |       |         |         |              |       |
| 7.575                                | 4 | 9 | 0 | 0 | 6.70  | 0.      | 0.      | % C(CH3)3    | %     |
| tert-butyl radical                   |   |   |   |   |       |         |         |              |       |
| 7.617                                | 4 | 7 | 0 | 0 | 0.00  | 0.      | 0.      | % C4H71-1    | %     |
| BcT, CH3CHCHCH2, methylallyl radical |   |   |   |   |       |         |         |              |       |
| 7.617                                | 4 | 7 | 0 | 0 | 0.00  | 0.      | 0.      | % C4H71-2    | % the |
| same as C4H71-1                      |   |   |   |   |       |         |         |              |       |
| 7.617                                | 4 | 7 | 0 | 0 | 0.00  | 0.      | 0.      | % C4H71-3    | %     |
| 7.617                                | 4 | 7 | 0 | 0 | 0.00  | 0.      | 0.      | % C4H71-4    | %     |

|                                       |   |    |   |   |       |    |    |                |      |
|---------------------------------------|---|----|---|---|-------|----|----|----------------|------|
| 7.617                                 | 4 | 7  | 0 | 0 | 0.00  | 0. | 0. | % C4H72-2      | %    |
| 7.351                                 | 4 | 8  | 0 | 0 | 9.55  | 0. | 0. | % C4H8-1       | %    |
| BcT, 1-Butene                         |   |    |   |   |       |    |    |                |      |
| 7.367                                 | 4 | 8  | 0 | 0 | 9.10  | 0. | 0. | % C4H8-2       | %    |
| BcT, 2-Butene, (Z)-; 7.501, 0.00 (E)- |   |    |   |   |       |    |    |                |      |
| 7.347                                 | 4 | 8  | 0 | 0 | 9.22  | 0. | 0. | % IC4H8        | %    |
| CH2C(CH3)CH3, 1-Propene, 2-methyl-    |   |    |   |   |       |    |    |                |      |
| 7.485                                 | 4 | 9  | 0 | 0 | 7.25  | 0. | 0. | % IC4H9        | %    |
| CH3CHCH2CH3, 2-Butyl                  |   |    |   |   |       |    |    |                |      |
| 7.369                                 | 4 | 9  | 0 | 0 | 7.93  | 0. | 0. | % TC4H9        | %    |
| CH2CH(CH3)2, Isobutyl                 |   |    |   |   |       |    |    |                |      |
| 6.437                                 | 4 | 4  | 1 | 0 | 8.88  | 0. | 0. | % C4H40        | %    |
| BcT, Furan                            |   |    |   |   |       |    |    |                |      |
| 7.907                                 | 4 | 6  | 1 | 0 | 9.75  | 0. | 0. | % C2H5CHCO     | % 2- |
| Butenal, CHOCHCHCH3                   |   |    |   |   |       |    |    |                |      |
| 7.762                                 | 4 | 6  | 1 | 0 | 9.75  | 0. | 0. | % SC3H5CHO     | %    |
| cis-2-Butenal                         |   |    |   |   |       |    |    |                |      |
| 7.841                                 | 4 | 6  | 1 | 0 | 8.68  | 0. | 0. | % CH2CHOCHCH2  | %    |
| vinyl ether                           |   |    |   |   |       |    |    |                |      |
| 6.951                                 | 4 | 6  | 1 | 0 | 9.16  | 0. | 0. | % C4H60        | %    |
| furan, 2,3-dihydro-                   |   |    |   |   |       |    |    |                |      |
| 7.625                                 | 4 | 8  | 1 | 0 | 9.71  | 0. | 0. | % C4H801-2     | %    |
| CHOCH(CH3)CH3, Propanal, 2-methyl-    |   |    |   |   |       |    |    |                |      |
| 7.567                                 | 4 | 8  | 1 | 0 | 9.52  | 0. | 0. | % C4H801-3     | %    |
| B3LYPultrafine, ccpVTZ                |   |    |   |   |       |    |    |                |      |
| 8.215                                 | 4 | 8  | 1 | 0 | 8.98  | 0. | 0. | % C4H801-4     | %    |
| C2H3OC2H5, ethene, ethoxy-            |   |    |   |   |       |    |    |                |      |
| 7.343                                 | 4 | 8  | 1 | 0 | 8.64  | 0. | 0. | % C4H802-3     | %    |
| CH2C(CH3)OCH3, 1-Propene, 2-methoxy-  |   |    |   |   |       |    |    |                |      |
| 7.389                                 | 4 | 4  | 2 | 0 | 9.60  | 0. | 0. | % C4H402       | % 2- |
| oxetanone, 4-methylene-               |   |    |   |   |       |    |    |                |      |
| 8.080                                 | 4 | 6  | 2 | 0 | 0.00  | 0. | 0. | % C4H602       | % 2- |
| propenoic acid, methyl ester          |   |    |   |   |       |    |    |                |      |
| 7.619                                 | 4 | 8  | 1 | 0 | 9.82  | 0. | 0. | % CHOCH2CH2CH3 | %    |
| Butanal                               |   |    |   |   |       |    |    |                |      |
| 8.003                                 | 4 | 8  | 2 | 0 | 9.19  | 0. | 0. | % IC4H700H     | %    |
| 1,4-Dioxane; ethyl acetate            |   |    |   |   |       |    |    |                |      |
| 8.003                                 | 4 | 8  | 2 | 0 | 10.01 | 0. | 0. | % TC3H60HCHO   | %    |
| C4H802, the same as above             |   |    |   |   |       |    |    |                |      |
| 8.711                                 | 4 | 10 | 2 | 0 | 9.65  | 0. | 0. | % IC4H902H     | %    |
| 1,3-Butanediol                        |   |    |   |   |       |    |    |                |      |
| 8.477                                 | 4 | 10 | 2 | 0 | 9.30  | 0. | 0. | % TC4H902H     | %    |
| 1,4-Butanediol                        |   |    |   |   |       |    |    |                |      |
| 7.635                                 | 5 | 5  | 0 | 0 | 0.00  | 0. | 0. | % C5H5         | %    |
| cyclopentadienyl radical, B3LYP, TZVP |   |    |   |   |       |    |    |                |      |
| 8.607                                 | 5 | 6  | 0 | 0 | 9.25  | 0. | 0. | % C5H6         | % 1- |
| buten-3-yne, 2-methyl-                |   |    |   |   |       |    |    |                |      |
| 9.458                                 | 5 | 7  | 0 | 0 | 7.25  | 0. | 0. | % C5H7         | %    |
| 1,3-pentadienyl, SVWN, 6-31+G**       |   |    |   |   |       |    |    |                |      |
| 9.288                                 | 5 | 8  | 0 | 0 | 8.86  | 0. | 0. | % C5H8         | %    |

|                                      |        |   |   |   |   |       |          |         |          |      |
|--------------------------------------|--------|---|---|---|---|-------|----------|---------|----------|------|
| 1,3-butadiene,2-methyl-              | 8.733  | 5 | 6 | 1 | 0 | 8.38  | 0.       | 0.      | % C5H60  | % 2- |
| methylfuran, TPSSh,6-31+G*           | 9.172  | 5 | 4 | 2 | 0 | 9.22  | 0.       | 0.      | % C5H402 | %    |
| furfural                             | 9.561  | 6 | 2 | 0 | 0 | 9.50  | 0.       | 0.      | % C6H2   | %    |
| M06-2X, hexatriyne                   | 8.945  | 6 | 4 | 0 | 0 | 0.00  | 0.       | 0.      | % C6H4   | %    |
| Benzyne                              | 9.083  | 6 | 5 | 0 | 0 | 8.32  | 1143.    | 337.3   | % C6H5   | %    |
| phenyl                               | 9.304  | 6 | 6 | 0 | 0 | 9.24  | 982.3    | 82.88   | % C6H6   | %    |
| benzene                              | 10.142 | 6 | 5 | 1 | 0 | 8.56  | 0.       | 0.      | % C6H50  | %    |
| phenoxy radical                      | 10.454 | 6 | 4 | 2 | 0 | 0.00  | 0.       | 0.      | % C6H402 | %    |
| parabenzoquinone                     | 1.401  | 0 | 2 | 0 | 1 | 10.78 | 1269.973 | 186.2   | % NH2    | %    |
| BcT, amino radical                   | 1.634  | 0 | 3 | 0 | 1 | 10.07 | 943.294  | -45.567 | % NH3    | %    |
| BcT, ammonia                         | 1.406  | 0 | 0 | 3 | 1 | 12.57 | 1292.57  | 74.628  | % N03    | %    |
| semi-empirical,PM6,nitrogen trioxide | 1.753  | 0 | 1 | 1 | 1 | 10.10 | 1163.44  | 214.51  | % HN0    | %    |
| BcT, nitrosyl hydride                | 2.260  | 0 | 3 | 1 | 1 | 10.00 | 854.33   | -25.23  | % NH20H  | %    |
| BcT, hydroxylamine                   | 2.372  | 0 | 3 | 1 | 1 | 0.00  | 0.       | 0.      | % NH30   | %    |
| BcT, ammonia oxide                   | 2.488  | 0 | 1 | 2 | 1 | 11.30 | 0.       | 0.      | % HN02   | %    |
| BcT, nitrous acid                    | 3.196  | 0 | 1 | 3 | 1 | 11.95 | 0.       | 0.      | % HN03   | %    |
| BcT, nitric acid                     | 4.189  | 0 | 1 | 4 | 1 | 0.00  | 0.       | 0.      | % H00N02 | %    |
| BcT, peroxy nitric acid              | 2.026  | 0 | 1 | 0 | 2 | 7.80  | 0.       | 0.      | % NNH    | %    |
| BcT, dinitrogen monohydride          | 2.303  | 0 | 2 | 0 | 2 | 9.65  | 1156.7   | 222.465 | % N2H2   | %    |
| BcT, trans-diazine                   | 2.793  | 0 | 4 | 0 | 2 | 8.10  | 879.85   | 95.18   | % N2H4   | %    |
| BcT, hydrazine                       | 3.922  | 0 | 0 | 2 | 2 | 0.00  | 0.       | 0.      | % ONN0   | %    |
| BcT, N0 dimer                        | 4.627  | 0 | 0 | 3 | 2 | 0.00  | 0.       | 0.      | % N203   | %    |
| BcT, dinitrogen trioxide             | 4.412  | 0 | 0 | 3 | 2 | 0.00  | 0.       | 0.      | % ONON0  | %    |
| BcT, nitrosyl nitrite                | 5.316  | 0 | 0 | 4 | 2 | 10.80 | 0.       | 0.      | % N204   | %    |
| BcT, dinitrogen tetroxide            | 2.778  | 0 | 0 | 0 | 3 | 11.06 | 1523.1   | 449.924 | % N3     | %    |

|                            |   |   |   |   |       |          |         |             |       |  |
|----------------------------|---|---|---|---|-------|----------|---------|-------------|-------|--|
| BcT, azide radical         |   |   |   |   |       |          |         |             |       |  |
| 3.164                      | 0 | 1 | 0 | 3 | 10.72 | 1334.177 | 291.826 | % HN3       | %     |  |
| BcT, hydrogen azide        |   |   |   |   |       |          |         |             |       |  |
| 2.803                      | 1 | 0 | 0 | 1 | 13.60 | 1788.9   | 438.68  | % CN        | %     |  |
| BcT/se3                    |   |   |   |   |       |          |         |             |       |  |
| 2.255                      | 1 | 1 | 0 | 1 | 12.50 | 1359.05  | 191.908 | % HNC       | %     |  |
| BcT, hydrogen isocyanide   |   |   |   |   |       |          |         |             |       |  |
| 2.126                      | 1 | 1 | 0 | 1 | 13.60 | 1448.748 | 129.799 | % HCN       | %     |  |
| BcT, hydrogen cyanide      |   |   |   |   |       |          |         |             |       |  |
| 2.595                      | 1 | 2 | 0 | 1 | 9.40  | 1171.87  | 238.569 | % H2CN      | % BcT |  |
| 2.933                      | 1 | 2 | 0 | 1 | 0.00  | 0.       | 0.      | % CNH2      | % BcT |  |
| 2.832                      | 1 | 2 | 0 | 1 | 0.00  | 0.       | 0.      | % HCNH      | % BcT |  |
| 2.943                      | 1 | 3 | 0 | 1 | 9.97  | 1039.34  | 88.701  | % CH2NH     | %     |  |
| BcT, methanimine           |   |   |   |   |       |          |         |             |       |  |
| 3.390                      | 1 | 5 | 0 | 1 | 8.90  | 859.387  | -19.380 | % CH3NH2    | %     |  |
| BcT, methyl amine          |   |   |   |   |       |          |         |             |       |  |
| 2.679                      | 1 | 0 | 1 | 1 | 11.76 | 1517.94  | 390.02  | % NCO       | %     |  |
| BcT, isocyanato radical    |   |   |   |   |       |          |         |             |       |  |
| 2.863                      | 1 | 1 | 1 | 1 | 11.60 | 1006.582 | -118.60 | % HNCO      | %     |  |
| BcT, isocyanic acid        |   |   |   |   |       |          |         |             |       |  |
| 2.826                      | 1 | 1 | 1 | 1 | 0.00  | 0.       | 0.      | % HOCN      | %     |  |
| BcT, cyanic acid           |   |   |   |   |       |          |         |             |       |  |
| 3.226                      | 1 | 1 | 1 | 1 | 10.83 | 1218.89  | 167.603 | % HCNO      | %     |  |
| BcT, fulminic acid         |   |   |   |   |       |          |         |             |       |  |
| 2.984                      | 1 | 3 | 1 | 1 | 10.16 | 0.       | 0.      | % CHONH2    | %     |  |
| TPSSh, 6-31G*, formamide   |   |   |   |   |       |          |         |             |       |  |
| 3.554                      | 1 | 3 | 1 | 1 | 0.00  | 0.       | 0.      | % HOCHNH    | %     |  |
| BcT, hydroxymethylimine    |   |   |   |   |       |          |         |             |       |  |
| 4.193                      | 1 | 3 | 2 | 1 | 11.08 | 0.       | 0.      | % CH3NO2    | %     |  |
| methane,nitro-             |   |   |   |   |       |          |         |             |       |  |
| 4.418                      | 1 | 3 | 2 | 1 | 10.44 | 0.       | 0.      | % CH3ONO    | %     |  |
| methyl nitrite             |   |   |   |   |       |          |         |             |       |  |
| 5.043                      | 1 | 3 | 3 | 1 | 11.53 | 0.       | 0.      | % CH3NO3    | %     |  |
| methyl nitrate             |   |   |   |   |       |          |         |             |       |  |
| 3.170                      | 1 | 0 | 0 | 2 | 0.00  | 0.       | 0.      | % NCN       | % BcT |  |
| 2.801                      | 1 | 0 | 0 | 2 | 0.00  | 0.       | 0.      | % CN2       | %     |  |
| BcT, 3H-diazirin-3-ylidene |   |   |   |   |       |          |         |             |       |  |
| 3.721                      | 1 | 2 | 0 | 2 | 0.00  | 0.       | 0.      | % HNCNH     | %     |  |
| BcT, diiminomethane        |   |   |   |   |       |          |         |             |       |  |
| 3.966                      | 1 | 2 | 0 | 2 | 10.30 | 0.       | 0.      | % CH2NN     | %     |  |
| BcT, diazomethane          |   |   |   |   |       |          |         |             |       |  |
| 3.390                      | 1 | 2 | 0 | 2 | 10.40 | 0.       | 0.      | % NH2CN     | %     |  |
| BcT, cynamamide            |   |   |   |   |       |          |         |             |       |  |
| 4.638                      | 1 | 6 | 0 | 2 | 0.00  | 0.       | 0.      | % NH2CH2NH2 | %     |  |
| diaminomethane             |   |   |   |   |       |          |         |             |       |  |
| 4.573                      | 1 | 4 | 1 | 2 | 9.70  | 0.       | 0.      | % NH2CONH2  | %     |  |
| urea                       |   |   |   |   |       |          |         |             |       |  |
| 5.365                      | 1 | 5 | 0 | 3 | 9.10  | 0.       | 0.      | % CH5N3     | %     |  |
| guanidine                  |   |   |   |   |       |          |         |             |       |  |
| 5.096                      | 1 | 2 | 0 | 4 | 10.95 | 0.       | 0.      | % CH2N4     | % 1H- |  |



|                                 |       |   |   |   |   |       |          |        |              |       |
|---------------------------------|-------|---|---|---|---|-------|----------|--------|--------------|-------|
| tetrazole                       | 6.413 | 1 | 3 | 0 | 5 | 0.00  | 0.       | 0.     | % CH3N5      | % 5-  |
| Aminotetrazole                  | 3.963 | 2 | 3 | 0 | 1 | 12.20 | 0.       | 0.     | % CH3CN      | %     |
| BcT, acetonitrile               | 4.194 | 2 | 3 | 0 | 1 | 11.53 | 0.       | 0.     | % CH3NC      | %     |
| BcT, methyl isocyanide          | 4.430 | 2 | 4 | 0 | 1 | 0.00  | 0.       | 0.     | % CH3CHN     | %     |
| BcT, methylmethaniminyl radical | 4.494 | 2 | 5 | 0 | 1 | 9.20  | 0.       | 0.     | % C2H5N      | %     |
| aziridine                       | 4.959 | 2 | 5 | 0 | 1 | 0.00  | 0.       | 0.     | % CH2CHNH2   | %     |
| aminoethene                     | 4.946 | 2 | 5 | 0 | 1 | 9.30  | 0.       | 0.     | % CH2NCH3    | % N-  |
| methylmethanimine               | 4.848 | 2 | 5 | 0 | 1 | 8.10  | 0.       | 0.     | % CH3CHNH    | %     |
| ethanimine                      | 5.240 | 2 | 7 | 0 | 1 | 8.90  | 0.       | 0.     | % CH3CH2NH2  | %     |
| Ethylamine                      | 5.269 | 2 | 7 | 0 | 1 | 8.24  | 0.       | 0.     | % CH3NHCH3   | %     |
| Dimethylamine                   | 5.204 | 2 | 5 | 1 | 1 | 9.69  | 0.       | 0.     | % CH3CONH2   | %     |
| acetamide                       | 5.694 | 2 | 5 | 1 | 1 | 10.00 | 0.       | 0.     | % CH3CHNOH   | %     |
| acetaldoxime                    | 5.698 | 2 | 5 | 2 | 1 | 8.90  | 0.       | 0.     | % H2NCH2COOH | %     |
| glycine                         | 6.930 | 2 | 5 | 3 | 1 | 11.22 | 0.       | 0.     | % C2H5N03    | %     |
| nitric acid, ethyl ester        | 5.725 | 2 | 3 | 3 | 1 | 10.51 | 0.       | 0.     | % C2H3N03    | %     |
| oxamic acid                     | 4.393 | 2 | 0 | 0 | 2 | 13.37 | 1606.684 | 309.28 | % C2N2       | %     |
| BcT, cyanogen                   | 6.386 | 2 | 8 | 0 | 2 | 8.60  | 0.       | 0.     | % C2H8N2     | %     |
| ethylenediamine                 | 6.450 | 2 | 8 | 0 | 2 | 0.00  | 0.       | 0.     | % CH3NHNHCH3 | %     |
| dimethyl hydrazine              | 6.382 | 2 | 6 | 1 | 2 | 9.66  | 0.       | 0.     | % C2H6N20    | %     |
| urea,methyl-                    | 6.363 | 2 | 4 | 2 | 2 | 9.41  | 0.       | 0.     | % C2H4N202   | %     |
| oxalamide                       | 7.374 | 2 | 6 | 2 | 2 | 9.53  | 0.       | 0.     | % C2H6N202   | %     |
| dimethylnitroamine              | 5.701 | 2 | 3 | 0 | 3 | 9.80  | 0.       | 0.     | % C2H3N3     | %     |
| 1H-1,2,4-Triazole               | 6.591 | 2 | 2 | 0 | 4 | 9.14  | 0.       | 0.     | % C2H2N4     | %     |
| sym-tetrazine                   | 6.957 | 2 | 4 | 0 | 4 | 10.30 | 0.       | 0.     | % C2H4N4     | % 1H- |
| tetrazole,5-methyl-             | 5.334 | 3 | 1 | 0 | 1 | 11.62 | 0.       | 0.     | % HCCCCN     | %     |

|                                     |   |   |   |   |       |        |         |   |              |       |  |
|-------------------------------------|---|---|---|---|-------|--------|---------|---|--------------|-------|--|
| BcT, cyanoacetylene                 |   |   |   |   |       |        |         |   |              |       |  |
| 5.695                               | 3 | 3 | 0 | 1 | 10.91 | 0.     | 0.      | % | C3H3N        | %     |  |
| acrylonitrile                       |   |   |   |   |       |        |         |   |              |       |  |
| 5.664                               | 3 | 5 | 0 | 1 | 11.85 | 0.     | 0.      | % | C2H5CN       | %     |  |
| ethyl cyanide, B3LYP,TZVP           |   |   |   |   |       |        |         |   |              |       |  |
| 6.346                               | 3 | 7 | 0 | 1 | 8.80  | 0.     | 0.      | % | C3H7N        | %     |  |
| cyclopropylamine                    |   |   |   |   |       |        |         |   |              |       |  |
| 5.820                               | 3 | 3 | 1 | 1 | 9.96  | 0.     | 0.      | % | C3H3N0       | %     |  |
| isoxazole                           |   |   |   |   |       |        |         |   |              |       |  |
| 7.807                               | 3 | 5 | 1 | 1 | 9.50  | 0.     | 0.      | % | CH2CHCONH2   | %     |  |
| acrylamide, B3LYP,aug-cc-pVDZ       |   |   |   |   |       |        |         |   |              |       |  |
| 6.330                               | 3 | 5 | 1 | 1 | 10.75 | 0.     | 0.      | % | CH3OCH2CN    | %     |  |
| methoxyacetonitrile                 |   |   |   |   |       |        |         |   |              |       |  |
| 7.207                               | 3 | 7 | 1 | 1 | 9.13  | 0.     | 0.      | % | C3H7N0       | %     |  |
| dimethylformamide                   |   |   |   |   |       |        |         |   |              |       |  |
| 6.032                               | 3 | 2 | 0 | 2 | 12.80 | 0.     | 0.      | % | C3H2N2       | %     |  |
| imidazolyl radical                  |   |   |   |   |       |        |         |   |              |       |  |
| 6.448                               | 3 | 4 | 0 | 2 | 9.38  | 0.     | 0.      | % | C3H4N2       | % 1H- |  |
| pyrazole                            |   |   |   |   |       |        |         |   |              |       |  |
| 7.029                               | 3 | 6 | 0 | 2 | 0.00  | 0.     | 0.      | % | C3H6N2       | % 3-  |  |
| aminopropionitrile                  |   |   |   |   |       |        |         |   |              |       |  |
| 7.018                               | 3 | 3 | 0 | 3 | 9.80  | 0.     | 0.      | % | C3H3N3       | %     |  |
| 1,3,5-Triazine                      |   |   |   |   |       |        |         |   |              |       |  |
| 6.801                               | 4 | 4 | 0 | 1 | 0.00  | 0.     | 0.      | % | C4H4N        | %     |  |
| pyrrolide radical                   |   |   |   |   |       |        |         |   |              |       |  |
| 7.141                               | 4 | 5 | 0 | 1 | 8.21  | 1083.0 | 306.085 | % | C4H5N        | %     |  |
| pyrrole                             |   |   |   |   |       |        |         |   |              |       |  |
| 7.508                               | 4 | 7 | 0 | 1 | 11.30 | 0.     | 0.      | % | CH3CH(CH3)CN | %     |  |
| propanenitrile,2-methyl-            |   |   |   |   |       |        |         |   |              |       |  |
| 7.566                               | 4 | 7 | 0 | 1 | 11.20 | 0.     | 0.      | % | CH3CH2CH2CN  | %     |  |
| butanenitrile                       |   |   |   |   |       |        |         |   |              |       |  |
| 7.776                               | 4 | 5 | 1 | 1 | 9.61  | 0.     | 0.      | % | C4H5N0       | %     |  |
| isoxazole,5-methyl-                 |   |   |   |   |       |        |         |   |              |       |  |
| 8.720                               | 4 | 0 | 0 | 2 | 11.81 | 0.     | 0.      | % | C4N2         | %     |  |
| BcT, 2-butyne dinitrile             |   |   |   |   |       |        |         |   |              |       |  |
| 8.409                               | 4 | 2 | 0 | 2 | 11.16 | 0.     | 0.      | % | C4H2N2       | %     |  |
| fumaronitrile                       |   |   |   |   |       |        |         |   |              |       |  |
| 7.591                               | 4 | 4 | 0 | 2 | 12.10 | 0.     | 0.      | % | C4H4N2       | %     |  |
| succinonitrile                      |   |   |   |   |       |        |         |   |              |       |  |
| 8.412                               | 4 | 6 | 0 | 2 | 8.50  | 0.     | 0.      | % | C4H6N2       | % 1H- |  |
| imidazole,2-methyl-                 |   |   |   |   |       |        |         |   |              |       |  |
| 9.412                               | 4 | 4 | 2 | 2 | 0.00  | 0.     | 0.      | % | C4H4N2O2     | %     |  |
| uracil, B3LYP,TZVP                  |   |   |   |   |       |        |         |   |              |       |  |
| 8.601                               | 5 | 5 | 0 | 1 | 9.26  | 0.     | 0.      | % | C5H5N        | %     |  |
| pyridine                            |   |   |   |   |       |        |         |   |              |       |  |
| 10.597                              | 5 | 0 | 0 | 4 | 0.00  | 0.     | 0.      | % | C(CN)4       | %     |  |
| BLYP,aug-cc-pVDZ, tetracyanomethane |   |   |   |   |       |        |         |   |              |       |  |
| 9.458                               | 5 | 5 | 1 | 1 | 9.50  | 0.     | 0.      | % | C5H5N0       | % 3-  |  |
| pyridinol, B3LYP,TZVP               |   |   |   |   |       |        |         |   |              |       |  |
| 13.156                              | 6 | 0 | 0 | 4 | 11.77 | 0.     | 0.      | % | C6N4         | %     |  |

tetracyanoethylene

---

|       |   |   |   |   |      |    |    |          |
|-------|---|---|---|---|------|----|----|----------|
| 0.897 | 0 | 3 | 1 | 0 | 24.7 | 0. | 0. | % H3O+   |
| 1.356 | 1 | 1 | 1 | 0 | 26.7 | 0. | 0. | % HCO+   |
| 1.281 | 1 | 3 | 0 | 0 | 25.6 | 0. | 0. | % CH3+   |
| 1.937 | 1 | 3 | 1 | 0 | 21.7 | 0. | 0. | % CH3O+  |
| 2.462 | 1 | 5 | 1 | 0 | 18.3 | 0. | 0. | % CH5O+  |
| 3.141 | 2 | 3 | 1 | 0 | 26.1 | 0. | 0. | % C2H3O+ |
| 1.424 | 0 | 0 | 2 | 0 | 0.45 | 0. | 0. | % O2-    |
| 1.258 | 0 | 1 | 1 | 0 | 1.83 | 0. | 0. | % OH-    |
| 2.677 | 1 | 0 | 3 | 0 | 2.69 | 0. | 0. | % CO3-   |
| 3.345 | 1 | 1 | 2 | 0 | 3.50 | 0. | 0. | % CHO2-  |
| 3.712 | 1 | 1 | 3 | 0 | 3.69 | 0. | 0. | % CHO3-  |
| 1.424 | 0 | 0 | 1 | 0 | 1.46 | 0. | 0. | % O-     |
